# Supplementary material for: Genetic Counseling and Management: The First Study to Report NIPT Findings in a Romanian Population
Source: MDPI journal article supplement (doi:10.3390/medicina58010079), 2022-01-05
Supplement: s1 [file s1]

**Table S1.** Combinations of indications and the results of the study.

| Combinations of Indications                                                               | Indication 1                    | Indication 2                                                                                                                                                     | Indication 3                                | Indication 4                   | NIPT result                         | Invasive Test Result: Final Result                                  |
|-------------------------------------------------------------------------------------------|---------------------------------|------------------------------------------------------------------------------------------------------------------------------------------------------------------|---------------------------------------------|--------------------------------|-------------------------------------|---------------------------------------------------------------------|
| Maternal age (years)<br>+ Ultrasound fetal abnormalities                                  | Maternal age 37                 | Ultrasound: Tricuspid valve regurgitation                                                                                                                        |                                             |                                | Low risk                            | Not necessary                                                       |
|                                                                                           | Maternal age 38                 | Ultrasound: renal pyelectasis, sexual ambiguity.                                                                                                                 |                                             |                                | Low risk                            | Not necessary                                                       |
|                                                                                           | Maternal age 37                 | Ultrasound: Pre-testing cystic hygroma with suspicion of Turner syndrome. Post- Nifty test, a second ultrasonography revealed polydactyly and heart abnormality. |                                             |                                | High risk for monosomy X            | CVS with QF-PCR: Trisomy 13                                         |
| DT + Ultrasound fetal abnormalities                                                       | DT: 1/196 for Trisomy 21        | Ultrasound: NT = 3mm                                                                                                                                             |                                             |                                | Low risk                            | Not necessary                                                       |
|                                                                                           | Increased AFP in maternal serum | Ultrasound: Intrauterine growth retardation, banana-shaped cerebellum, risk of neural tube defect                                                                |                                             |                                | Low risk                            | Not necessary                                                       |
| DT + maternal age (years)                                                                 | DT: 1/80 for Trisomy 21         | Maternal age 36                                                                                                                                                  |                                             |                                | Low risk                            | Not necessary                                                       |
| DT + positive obstetrical history                                                         | DT: 1/390 for Trisomy 18        | History of hydrops fetalis with intrauterine fetal death                                                                                                         |                                             |                                | Low risk                            | Not necessary                                                       |
| DT + Chromosomal anomalies in the family                                                  | DT: 1/120 for Trisomy 21        | The pregnant woman is a carrier of a translocation t(8q;16p)                                                                                                     |                                             |                                | Low risk                            | Not necessary                                                       |
| Maternal age (years) + Genetic abnormality in the family                                  | Maternal age 39                 | The pregnant woman is a carrier of a large deletion extending from exon 48 to exon 51 in the dystrophin gene                                                     |                                             |                                | Low risk Female fetus               | Not necessary                                                       |
|                                                                                           | Maternal age 39                 | Partner with inversion of chromosome 9 inv(9)(p11;q13)                                                                                                           |                                             |                                | Low risk                            | Not necessary                                                       |
| Maternal age (years) + Genetic abnormality in the family + Positive obstetrical history   | Maternal age 38                 | Previous child with 8p21.3→p23.3 duplication                                                                                                                     | Two miscarriages                            |                                | Low risk                            | Not necessary                                                       |
| Maternal age (years) + DT + Ultrasound fetal abnormalities + Positive obstetrical history | Maternal age 44                 | Cousin with trisomy 21                                                                                                                                           |                                             |                                | High risk for trisomy 18            | CVS with QF-PCR: normal                                             |
|                                                                                           | Maternal age 41                 | DT: ¼ for Trisomy 21                                                                                                                                             | Bilateral hyperechogenic kidney; hyperechog | Previous fetus with trisomy 21 | High risk for trisomy 14 and del(X) | Deletion del(X) (p11.1-ter); confirmed Trisomy 14 was not confirmed |

---

enic fetal  
bowel;  
abnormal  
venous  
duct,  
bilateral  
hydrothora  
x; ascites

---
